# Supplementary material
Source: Springer Nature journal article supplement (https://www.springermedizin.de/resource/supplementary/12997_2008_34_MOESM4_ESM.pdf/9623174)

**Patient #10 VC (AUC=201)**

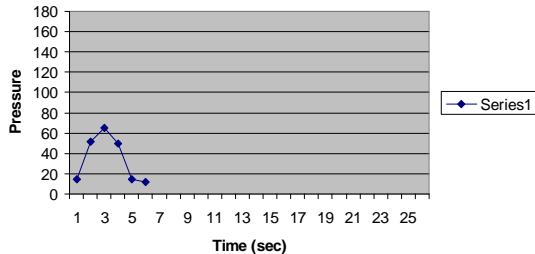

**Patient #10 IRCT (AUC=964)**

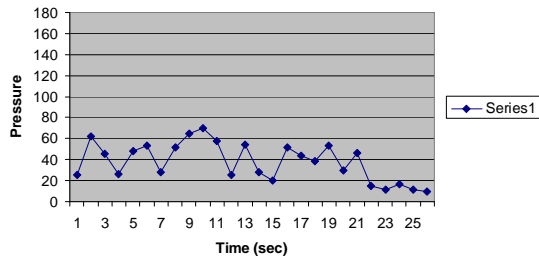

**Patient #11 VC (AUC=22)**

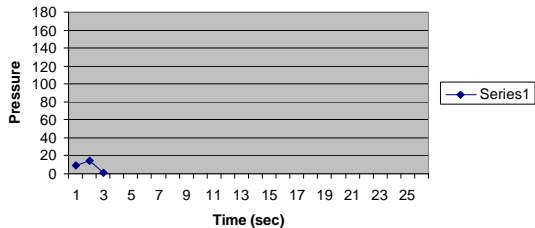

**Patient #11 IRCT (AUC=111)**

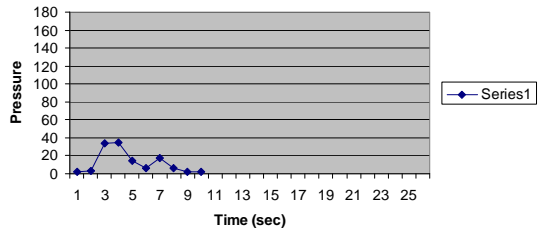

Supplement: MOESM4 [file 9623174]
